# Supplementary material for: Practical immune-barometer sensor for trivalent chromium ion detection using gold core platinum shell nanoparticle probes
Source: Royal Society of Chemistry journal article supplement (doi:10.1039/c7an02047c), 2018-01-01
Supplement: c7an02047c1.pdf [file c7an02047c1.pdf]

# Supporting Information for

## Practical immune-barometer sensor for trivalent Chromium Ions detection using gold core platinum shell nanoparticles Probes

Meng Xiao<sup>a</sup>, Haicong Shen<sup>a</sup>, Qiangqiang Fu<sup>a</sup>, Wei Xiao<sup>a</sup>, Hongfen Bian<sup>a</sup>, Zhigang Zhang<sup>c</sup>, Yong Tang<sup>a, b\*</sup>

<sup>a</sup> Department of Bioengineering, Guangdong Province Engineering Research Center for antibody drug and immunoassay, Jinan University, Guangzhou 510632, PR China.

<sup>b</sup> Institute of Food Safety and Nutrition, Jinan University, Guangzhou, 510632, PR China

<sup>c</sup> State Key Laboratory of Food Safety Technology for Meat Products, Xiamen Yinxiang Group CO. Ltd, Xiamen, 361100, PR China

\* Tel: (+86)-20-85227003, E-mail: tyjaq7926@163.com;

### 1. The amount of mAb-MBs added optimization

The procedures of optimized the amount of anti-Cr(III)-EDTA mAb - MBs were as follows: For positive control, 1  $\mu\text{L}$ , 2  $\mu\text{L}$ , 4  $\mu\text{L}$ , 6  $\mu\text{L}$  and 8  $\mu\text{L}$  anti-Cr(III)-EDTA mAb - MBs were mixed with 100  $\mu\text{L}$  20 ng.  $\text{mL}^{-1}\text{Cr(III)}$  solution in 0.5 mM EDTA reagent diluent. Then, 5  $\mu\text{L}$  Cr(III)-EDTA-BSA-Au@PtNPs were added into the solution. For negative control, 1  $\mu\text{L}$ , 2  $\mu\text{L}$ , 4  $\mu\text{L}$ , 6  $\mu\text{L}$  and 8  $\mu\text{L}$  anti-Cr(III)-EDTA mAb - MBs were mixed with 100  $\mu\text{L}$  PBS buffer and 5  $\mu\text{L}$  Cr(III)-EDTA-BSA-Au@PtNPs were added. After washing, 200  $\mu\text{L}$  of 30%  $\text{H}_2\text{O}_2$  were added and measured the pressure change by barometer. The ratio of negative and positive values with different amount of anti-Cr(III)-EDTA mAb - MBs was calculated.

## 21 **2. Au@PtNPs labeled Cr(III)-EDTA-BSA optimization**

22 1  $\mu\text{L}$ , 2  $\mu\text{L}$ , 3  $\mu\text{L}$ , 4  $\mu\text{L}$ , 5  $\mu\text{L}$  and 6  $\mu\text{L}$  1 mg/mL Cr(III)-EDTA -BSA were used to  
23 label 1 mL Au@PtNPs respectively. For positive control, 4  $\mu\text{L}$  anti-Cr(III)-EDTA mAb  
24 - MBs were mixed with 100  $\mu\text{L}$  20 ng. mL<sup>-1</sup> Cr(III) solution in 0.5 mM EDTA reagent  
25 diluent. Then, 5  $\mu\text{L}$  Cr(III)-EDTA-BSA-Au@PtNPs were added into the solution.  
26 Cr(III)-EDTA-BSA-Au@PtNPs were added into the solution. For negative control, 4  
27  $\mu\text{L}$  anti-Cr(III)-EDTA mAb - MBs were mixed with 100  $\mu\text{L}$  PBS buffer and 5  $\mu\text{L}$  Cr(III)-  
28 EDTA-BSA-Au@PtNPs were added. After washing, 200  $\mu\text{L}$  of 30% H<sub>2</sub>O<sub>2</sub> were added  
29 and measured the pressure change by barometer. The ratio of negative and positive  
30 values with different amount of mAb labeled Au@PtNPs was calculated.

## 31 **3. enzyme-linked immunosorbent assay (ELISA) for Cr(III) detection**

32 In a typical experimental procedure, 100  $\mu\text{L}$  of 10  $\mu\text{g}/\text{mL}$  Cr(III) antibody was first  
33 bound to a 96-well microplate well and incubated overnight at 4°C. Then, each well was  
34 washed three times with 300  $\mu\text{L}$  Wash Buffer (0.05% Tween20 in PBS) and the remaining  
35 wash buffer was removed by inverting 96-well microplate well to blot it against clean  
36 paper towels each time. After that, 300  $\mu\text{L}$  1% BSA in PBS was added to block each  
37 well, incubated for 1 h at room temperature, and washed three times. A 100- $\mu\text{L}$  aliquot  
38 of Cr(III) solution (0, 0.5, 1, 2, 4, 8, 16, 32, 64, 128 and 256 ng/mL) in 0.5 mM EDTA  
39 Reagent Diluent was added to the well. Subsequently, 100  $\mu\text{L}$  of 0.2  $\mu\text{g}/\text{mL}$  Cr(III)-  
40 EDTA-BSA -HRP was added and incubated for 1 h at room temperature. After repeated  
41 washing three times, 100  $\mu\text{L}$  TMB substrate was add each well, incubated for 10 min  
42 in the dark at room temperature, and then 50  $\mu\text{L}$  of 2 M H<sub>2</sub>SO<sub>4</sub> were added to stop the  
43 reaction. The result was analyzed by ultraviolet-visible spectrophotometer.

44

## 45 Result

46

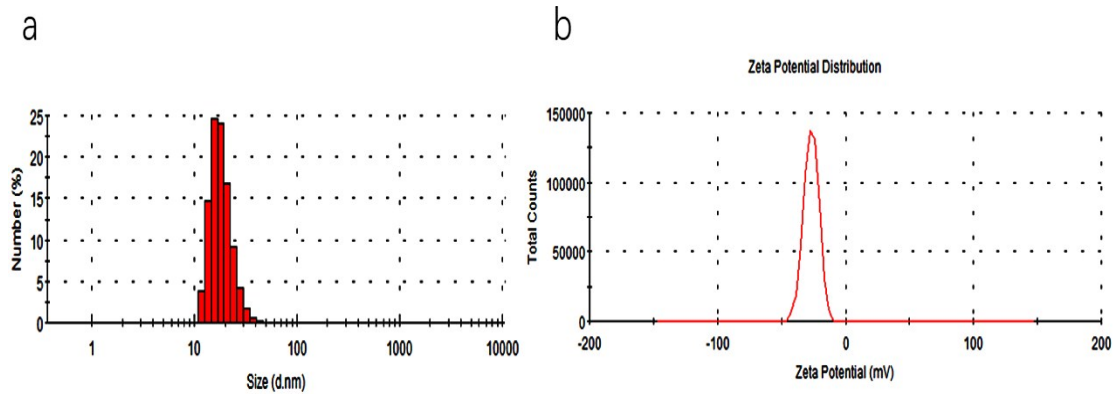

47

48 Fig. S1. a). The size distribution of Au@PtNPs by DLS. b). The zeta potential of

49 Au@PtNPs.

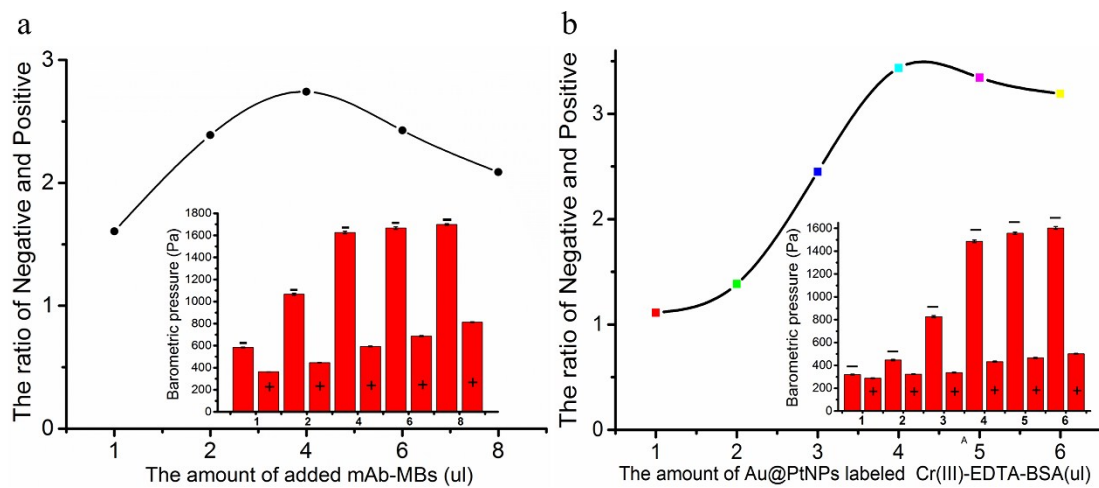

50

51 Fig. S2. a). Optimized the amount of added mAb-MBs optimization. b) Optimized the

52 amount of Au@PtNPs labeled Cr(III)-EDTA-BSA.

53

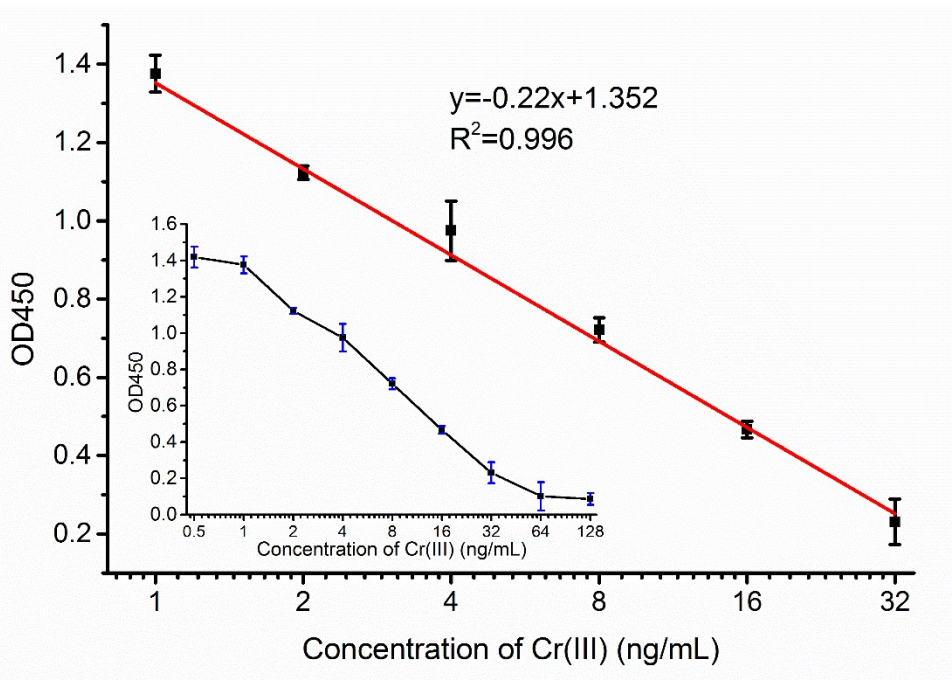

54

55 Fig. S3). The dynamic range and calibration curve of ELISA for Cr(III) detection

56 ( $R^2=0.996$ ). Each value presents the mean from 3 independent experiments ( $n = 3$ ).

57

Table S1. Intra-Assay and Inter-Assay Precision.

|                          | Spiked concentrations<br>(ng. mL <sup>-1</sup> ) | Measured Value<br>(Mean, ng. mL <sup>-1</sup> ) | SD    | CV<br>(%) |
|--------------------------|--------------------------------------------------|-------------------------------------------------|-------|-----------|
| Intra-Assay<br>Precision | 2.5                                              | 2.536                                           | 0.091 | 3.6       |
| Inter-Assay<br>Precision | 2.5                                              | 2.452                                           | 0.213 | 8.7       |
| Intra-Assay<br>Precision | 10                                               | 10.397                                          | 0.551 | 5.3       |
| Inter-Assay<br>Precision | 10                                               | 9.762                                           | 1.093 | 11.2      |
| Intra-Assay<br>Precision | 20                                               | 19.51                                           | 0.936 | 4.8       |
| Inter-Assay<br>Precision | 20                                               | 19.14                                           | 1.971 | 10.3      |

Notes: CV (%) is calculated from SD /Mean. ( $n = 3$ ). SD: Standard deviation. CV:

Coefficient of variation

58
